# Supplementary material
Source: PubMed Central journal article supplement (PMC10309537)
Supplement: NIHMS1852969-supplement-supplement.pdf [file NIHMS1852969-supplement-supplement.pdf]

## Supplementary Appendix

Supplement to: Mailankody S, Devlin SM, Landa J, et al. GPRC5D-targeted CAR T cells for myeloma. *N Engl J Med* 2022;387:1196-206. DOI: 10.1056/NEJMoa2209900

This appendix has been provided by the authors to give readers additional information about the work.

# Table of Contents

|                                                                                                                                                                                                                                                                                                                                                                                                                                                                                                                                                               |       |
|---------------------------------------------------------------------------------------------------------------------------------------------------------------------------------------------------------------------------------------------------------------------------------------------------------------------------------------------------------------------------------------------------------------------------------------------------------------------------------------------------------------------------------------------------------------|-------|
| Supplementary Methods .....                                                                                                                                                                                                                                                                                                                                                                                                                                                                                                                                   | 3-4   |
| Results of CSF analysis in the two patients with cerebellar toxicity .....                                                                                                                                                                                                                                                                                                                                                                                                                                                                                    | 4-5   |
| Figure S1: CONSORT Diagram .....                                                                                                                                                                                                                                                                                                                                                                                                                                                                                                                              | 6     |
| Figure S2A: Timeline of clinical events for patient 011 .....                                                                                                                                                                                                                                                                                                                                                                                                                                                                                                 | 7     |
| Figure S2B: Timeline of clinical events for patient 016.....                                                                                                                                                                                                                                                                                                                                                                                                                                                                                                  | 8     |
| Figure S3A: Microarray expression data (z-score) of the Allen Brain Atlas for two probes for <i>GPRC5D</i> from six healthy brain donors grouped according to the brain region demonstrating high <i>GPRC5D</i> expression in the inferior olivary nucleus (IOC). Shown for comparison, expression data from <i>POU4F1</i> ( <i>BRN3A</i> ; two probes) the most differentially expressed gene in the IOC relative to other brain regions; and <i>TNFRSF17</i> ( <i>BCMA</i> ; single probe) predominantly expressed in the caudate nucleus and putamen. .... | 9     |
| Figure S3B: Quantitative representation of the Allen Brain Atlas <i>GPRC5D</i> microarray expression data for two probes with boxplots showing normalized expression (log2) across all six donors for all brain sub-structures, grouping all with left/right delineation .....                                                                                                                                                                                                                                                                                | 10    |
| Figure S3C: Brain sub-structures classified within the myelencephalon graphed separately for enhanced visualization (same data and analysis as supplementary Figure 3B) .....                                                                                                                                                                                                                                                                                                                                                                                 | 11    |
| Figure S4A: Peak MCARH109 expansion in the peripheral blood across doss levels .....                                                                                                                                                                                                                                                                                                                                                                                                                                                                          | 12    |
| Figure S4B: Median area under the curve over the first 28 days post- MCARH109 infusion .....                                                                                                                                                                                                                                                                                                                                                                                                                                                                  | 13    |
| Table S1: Baseline characteristics, response to MCARH109 infusion, and GPR5CD expression by immunohistochemistry pre-infusion and at time of relapse .....                                                                                                                                                                                                                                                                                                                                                                                                    | 14-15 |
| Table S2: Pre-infusion characteristics including release criteria for MCARH109 .....                                                                                                                                                                                                                                                                                                                                                                                                                                                                          | 16    |
| Table S3: Prior multiple myeloma treatment history for patients treated with MCARH109 .....                                                                                                                                                                                                                                                                                                                                                                                                                                                                   | 17-23 |
| Table S4: Baseline characteristics of patients with and without delayed cerebellar toxicity .....                                                                                                                                                                                                                                                                                                                                                                                                                                                             | 24-25 |

### **MCARH109 manufacturing**

Patient apheresis product was collected and CD4+ and CD8+ cells were selected using CD4+ Microbeads and CD8+ Microbeads respectively via CliniMACS-plus (Miltenyi). Briefly, on day 0, cryopreserved CD4+ and CD8+ selected cells were thawed, washed, combined at CD4+CD3+ and CD8+CD3+ cells at 1 to 1 ratio, and activated by paramagnetic Dynabeads CD3/28 (Dynabeads ClinEx Vivo CD3/CD28, Invitrogen) at a bead to T cell ratio of 1:1. One day post activation, cells were transduced with lentiviral vector via spinoculation in PermaLife cell bags (OriGen Biomedical) at room temperature. Transduced cells were inoculated in Xuri W25 bioreactor (Cytiva) with perfusion mode approximately 48hr post transduction. Medium used for the culture was X-VIVO 15 (Lonza) supplemented with heat-inactivated human AB Serum (Gemini), Glutamax, IL2, IL7, and IL15 (CellGenix). At the end of process, the paramagnetic Dynabeads CD3/28 were removed using Dynal ClinExVIVO MPC magnet (Invitrogen). Cells were washed, formulated, and cryopreserved using control-rate freezer (ThermoFisher).

### **MCARH109 expansion and persistence after MCARH109 infusion**

Serial evaluation of expansion and persistence of MCARH109 in the peripheral blood was done using real time PCR. DNA was extracted from 200uL whole blood on the Promega Maxwell® RSC Instrument using the Promega Maxwell RSC A54500 kit and eluted in 50uL. 5uL of DNA extract were amplified on the Applied Biosystems Via 7 instrument with primers and probe specific to the MCARH109 construct. The results were reported in vector copies per mL of blood. The sensitivity cut-off is 50 vector copies per mL of blood.

### **Multiparametric flow cytometric analysis of MCARH109**

Cells were washed and resuspended in PBS, then incubated with Human TruStain FcX Fc receptor blocking solution (Biolegend) and Live/DEAD Fixable Blue Dead Cell Stain (Invitrogen) according to the manufacturers' specifications for 20 minutes at room temperature (RT), protected from light. The cells were washed once in Flow Wash Buffer (FWB; RPMI 1640 no phenol red + 4% FBS +0.01% sodium-azide) and incubated with the antibody mix for 20 minutes at RT in the dark in the presence of Brilliant Staining Buffer (BD). The cells were washed, resuspended in 0.5% paraformaldehyde/PBS, and immediately acquired using a Cytex Aurora 5L flow cytometer (Cytex). The optimal concentration of all antibodies used in the study was defined by titration. Further information about the antibodies can be found in Supplementary Table 1. Analysis was performed with FlowJo v10.8.1.

### **Bone marrow and plasmacytoma GPRC5D expression**

We evaluated the GPRC5D antigen, using immunohistochemical method. We used a commercially available antibody, clone 6D9 (ab55044; Abcam, Waltham, MA) at 1:1K dilution (1.0 µg/mL). Staining was performed on the Leica Bond-3 auto staining system (Leica, Buffalo Grove, IL), using heat-based antigen retrieval, a high pH buffer solution (AR9640; Leica, Bond Epitope Retrieval Solution 2, 30 minutes), 30-minute primary incubation time, and a polymer detection system (DS9800; Leica, Bond Polymer Refine Detection).

Morphologic features and CD138 immunohistochemical staining were used as a control for percentage and distribution of plasma cells in submitted slides. The percentage and distribution were then correlated to assess GPRC5D expression on CD138 positive cells. A scoring system was developed to assess GPRC5D percentage and intensity. Intensity was score as weak, moderate, and strong; scores ranged from 1-3. 1 is the score for faint membranous, often incomplete staining and/or weak intracytoplasmic staining. 2 is the score for moderate intensity staining, complete membranous staining, with or without cytoplasmic staining. 3 is the score reserved for strong complete membranous staining, often observed with cytoplasmic immunoreactivity and Golgi accentuation. Any, as low as <5%, expression of GPRC5D on CD138 positive cells was reported in 10% increments. A binary final score was given (0 & 1). Any intensity/percentage of GPRC5D was given a final score of 1. A final score of 0 denoted negative GPRC5D on all CD138 positive cells examined.

### **Results of CSF analysis in the two patients with cerebellar toxicity**

Patient 011 had the procedure on 11/19/21 and the results are as follows- Total cells: 18; RBC: 1/microl; nucleated cells: 1/microl; lymphocytes: 89%; protein: 28 mg/dL; glucose: 61 mg/dL; meningitis/encephalitis PCR panel negative; gram stain and bacterial culture: negative; encephalopathy-autoimmune panel: negative; adenovirus: negative; Lyme disease antibodies: negative; Cytology: negative for malignant cells. Patient 016 has the procedure on 10/25/21 and the results are as follows- Total cells counted: 81; RBC: 243/microl; nucleated cells: <1/microl; protein: 19 mg/dL; glucose: 46 mg/dL; meningitis/encephalitis PCR panel negative; gram stain and bacterial culture: negative; JC virus: negative; EBV PCR: negative; cytology: no malignant cells; flow cytometry: no abnormal plasma cells detected. Patient 016 had a repeat procedure on 2/15/22 and the results are as follows- flow cytometry: 1. No abnormal plasma cell population detected. Virtually no plasma cell seen. No evidence of an abnormal plasma cell population is identified by flow cytometry; 2. No abnormal mature T cell population detected. Virtually no T cell seen. No immunophenotypic evidence of T-cell lymphoma is identified. Protein: 21 mg/dL; glucose: 55 mg/dL; Total cells counted: 14; RBC: 5/microl; nucleated cells:

1/microL. On 2/25/22 we also assessed for CAR+ cells in the CSF by flow cytometry and detected a 3 cells that were CAR+ (total events: 194,240; cells: 31,702; CD45+ cells: 138; CD3+ cells: 24; CD3+CAR+ cells: 3; CD3+/CAR+/CD4+: 3).

**Figure S1: Consort Diagram for the trial**

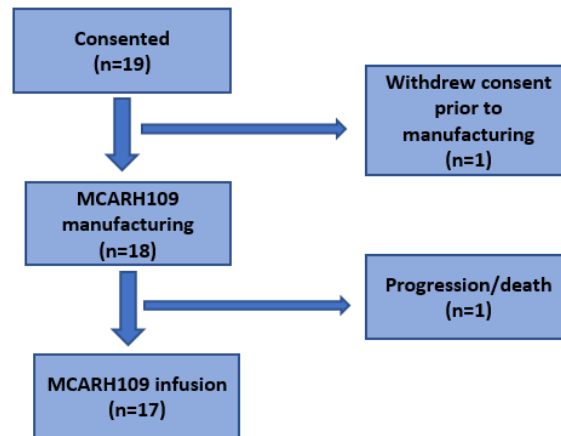

**Figure S2A: Timeline of clinical events for patient 011**

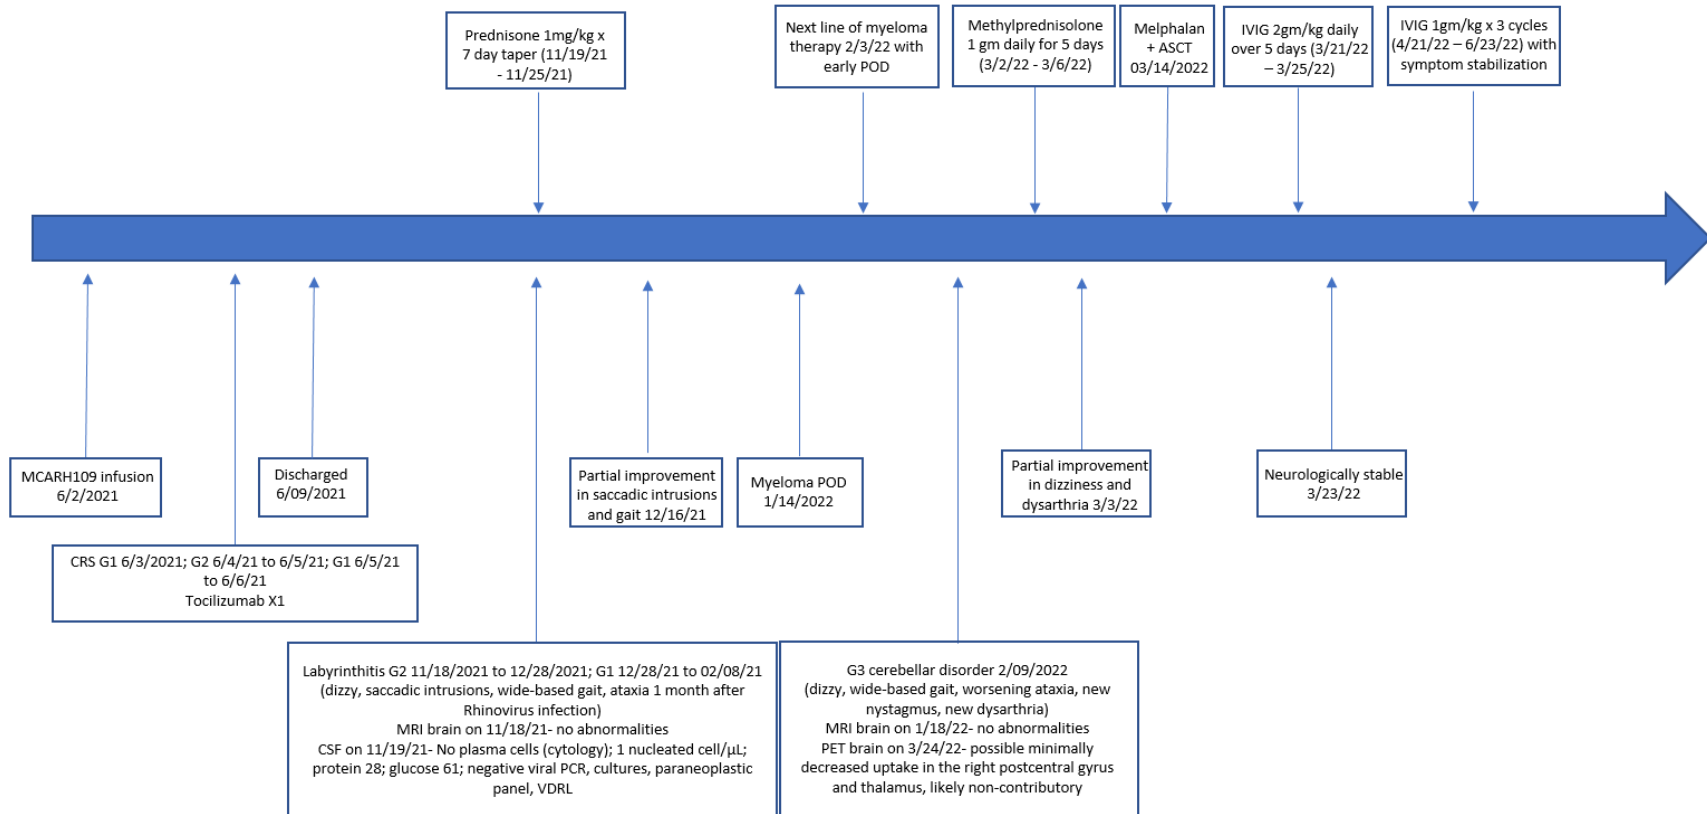

**Figure S2B: Timeline of clinical events for patient 016**

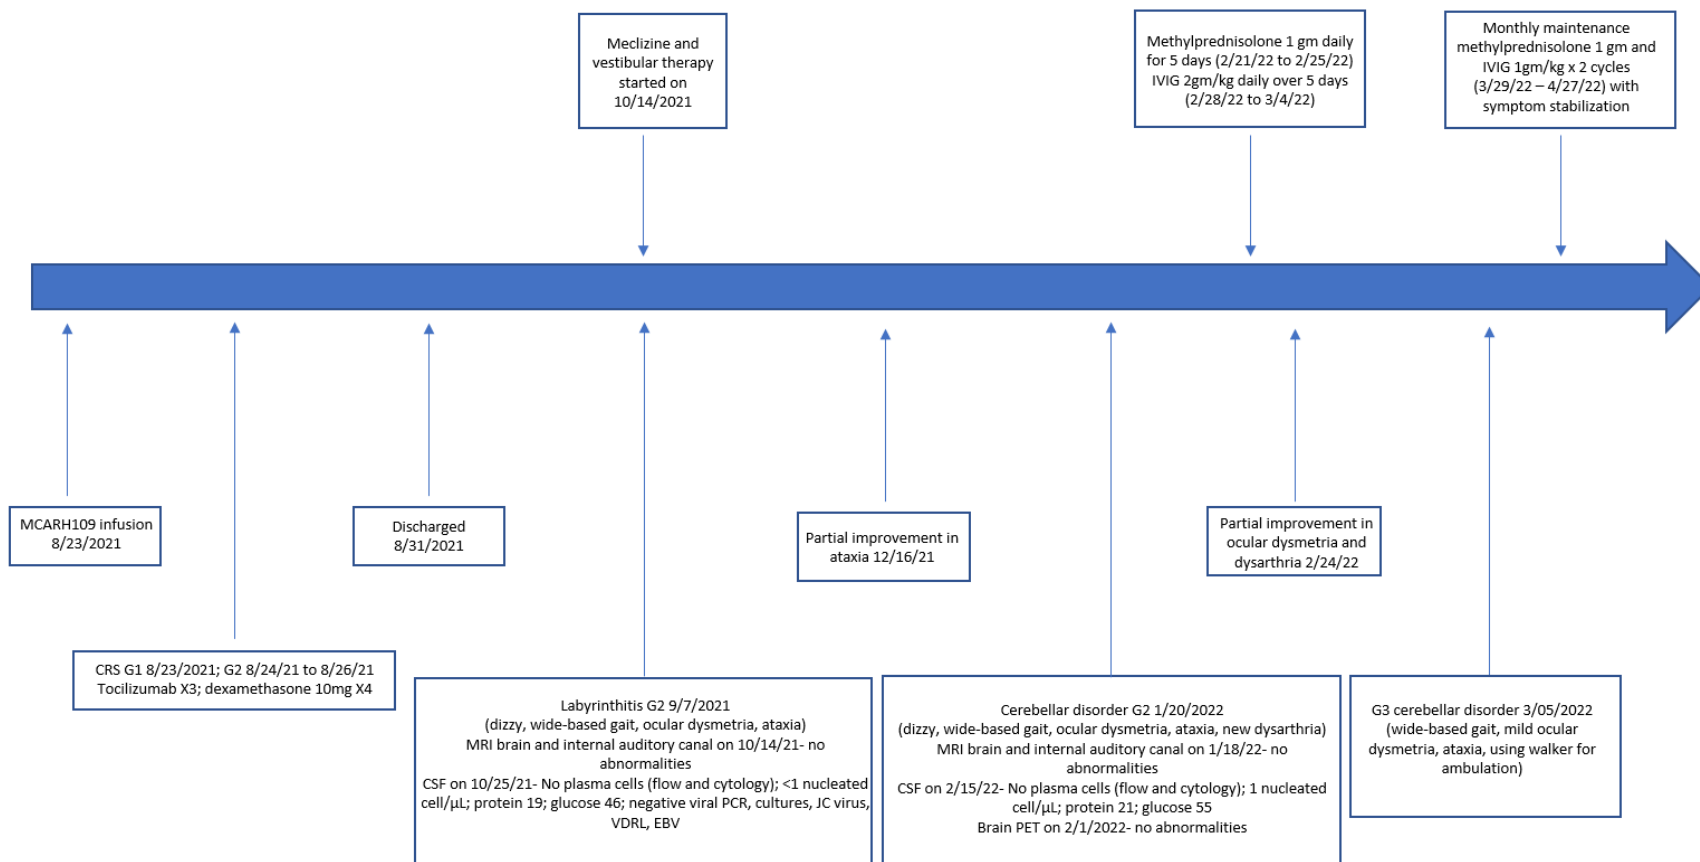



**Figure S3A: Microarray expression data (z-score) of the Allen Brain Atlas for two probes for *GPRC5D* from six healthy brain donors grouped according to the brain region demonstrating high *GPRC5D* expression in the inferior olivary nucleus (IOC). Shown for comparison, expression data from *POU4F1* (*BRN3A*; two probes) the most differentially expressed gene in the IOC relative to other brain regions; and *TNFRSF17* (*BCMA*; single probe) predominantly expressed in the caudate nucleus and putamen.**

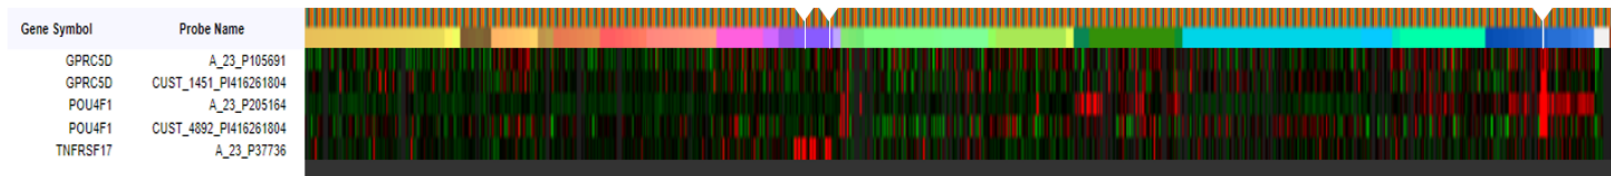

White carrots indicate the caudate, putamen and IOC, from left to right, respectively. Image credit: Allen Institute for Brain Science; available from: [human.brain-map.org](http://human.brain-map.org). Coloring: top row represents 6 individual donors; second row represents brain regions and are consistent across the figure.

**Figure S3B: Quantitative representation of the Allen Brain Atlas *GPRC5D* microarray expression data for two probes with boxplots showing normalized expression (log<sub>2</sub>) across all six donors for all brain sub-structures, grouping all with left/right delineation.**

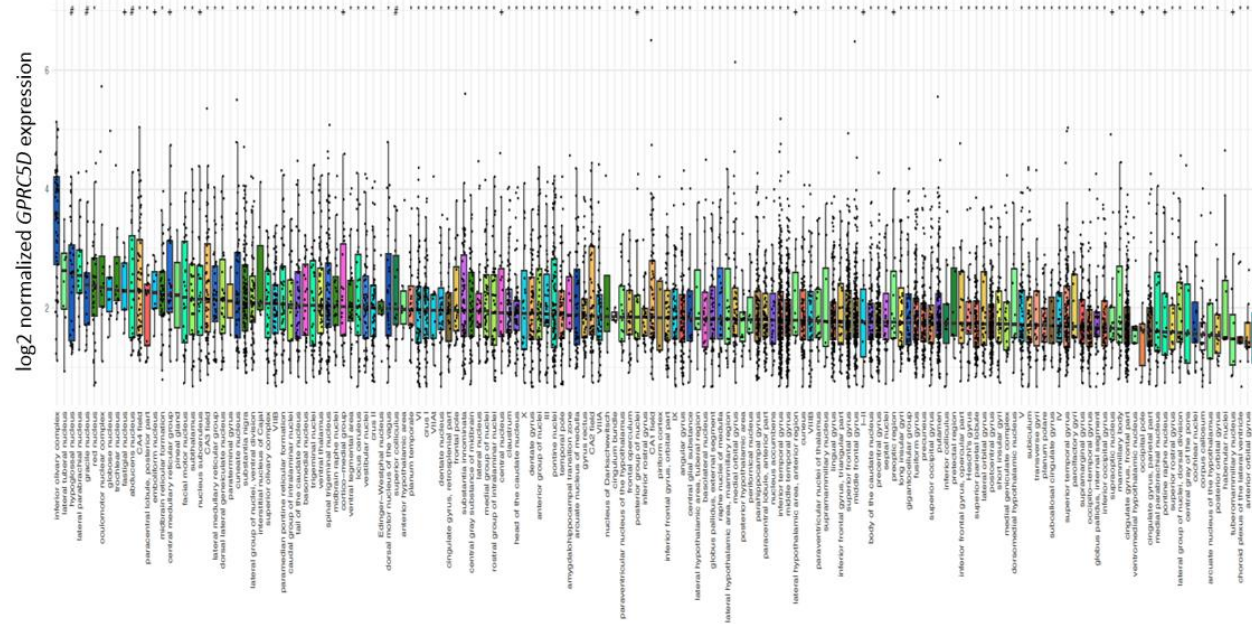

Boxplots represent median, 25th and 75th percentiles and whiskers up to 1.5 \* interquartile range beyond the boxes. The normalized expression (log<sub>2</sub>) across all six donors is shown for all brain sub-structures, with grouping all with left/right delineation (N=7404 observations). Significance levels (\* ≤ .001, + ≤ .01, # ≤ .05) are from unpaired two-sample, two-sided Welch t-tests comparing expression in the IOC against each other structure and have been corrected for multiple testing using a Bonferroni correction.

**Figure S3C: Brain sub-structures classified within the myelencephalon graphed separately for enhanced visualization (same data and analysis as supplementary Figure 3B)**

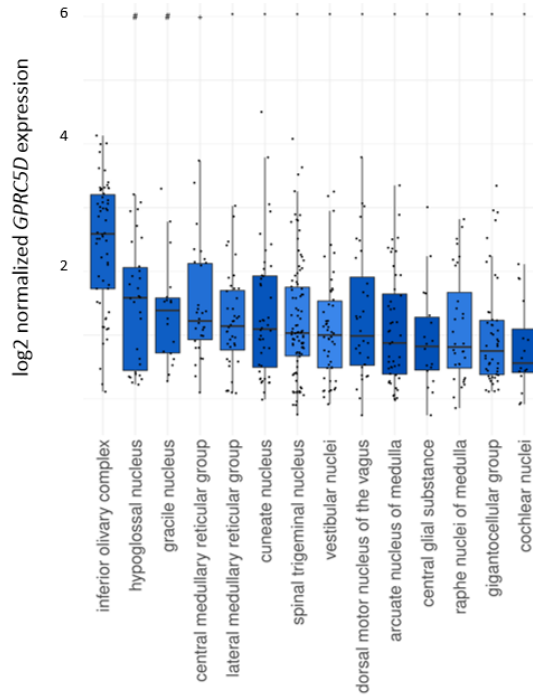

**Figure S4A: Peak MCARH109 expansion in the peripheral blood across dose levels**

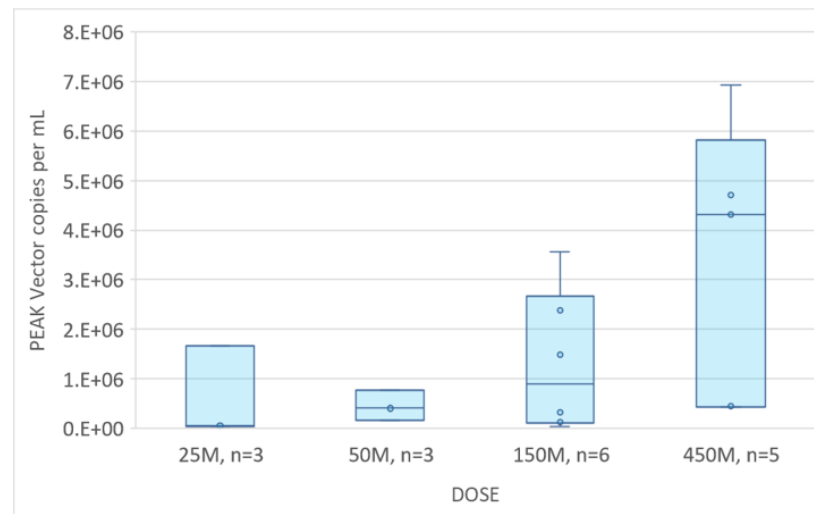

Peak MCARH109 expansion was measured by peak vector copies per mL. Dose levels are as follows: 25M =  $25 \times 10^6$ , 50M =  $50 \times 10^6$ , 150M =  $150 \times 10^6$  and 450M =  $450 \times 10^6$  CAR T-cells

**Figure S4B: Median area under the curve over the first 28 days post-MCARH109 infusion ( $AUC_{0-28}$  days)**

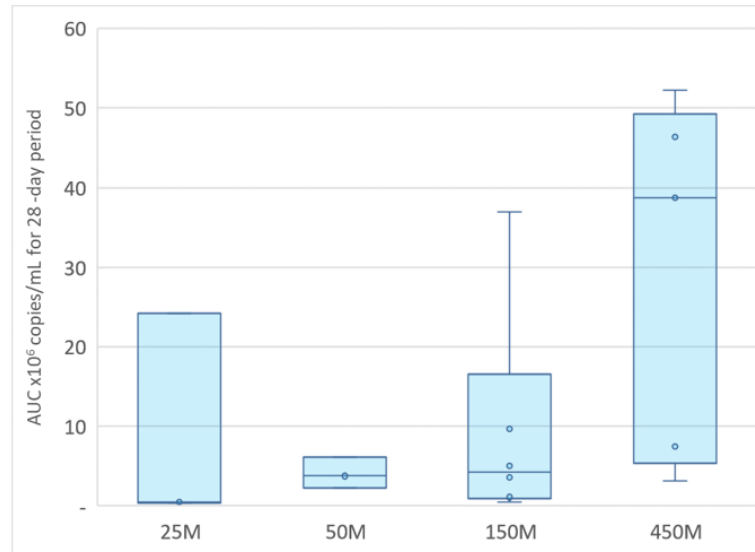

Dose levels are as follows: 25M =  $25 \times 10^6$ , 50M =  $50 \times 10^6$ , 150M =  $150 \times 10^6$  and 450M =  $450 \times 10^6$  CAR T-cells

**Table S1: Baseline characteristics, response to MARCH109 infusion, and GPR5CD expression by immunohistochemistry pre-infusion and at time of relapse**

| ID | Dose level | Baseline characteristics |                    |                                     |     | Response to MARCH109  |                    |                   | Pre-infusion GPR5CD expression <sup>§</sup> |                              |                      | Relapse | GPR5CD expression at relapse <sup>§</sup> |                    |                      |
|----|------------|--------------------------|--------------------|-------------------------------------|-----|-----------------------|--------------------|-------------------|---------------------------------------------|------------------------------|----------------------|---------|-------------------------------------------|--------------------|----------------------|
|    |            | Myeloma subtype          | Measurable disease | High risk cytogenetics <sup>†</sup> | EMP | Best overall response | % reduction in EMP | BM MRD negativity | Y/N                                         | % expression on plasma cells | Staining intensity   | Y/N     | % expression on plasma cells              | Staining Intensity |                      |
| 1  | 1          | IgA kappa                | Serum M-spike      | Y                                   | Y   | VGPR                  | 99.1%              | Y                 | Y                                           | 100%                         | 3+                   | Y       | Y                                         | 10%                | 1+                   |
| 2  | 1          | Free lambda              | EMP                | Y                                   | Y   | PD                    | N/A                | N                 | Y                                           | 80%                          | 1+                   | Y       | N                                         | 0%                 | N/A                  |
| 3  | 1          | Free kappa               | EMP                | Y                                   | Y   | SD                    | 31.3%              | Y                 | Y                                           | 100%                         | 3+                   | Y       | Y                                         | 70%                | 1+ & 3+ <sup>‡</sup> |
| 4  | 2          | IgG lambda               | Free light chains  | Y                                   | N   | sCR                   | N/A                | Y                 | Y                                           | 90%                          | 1+                   | N       | N/A                                       | N/A                | N/A                  |
| 5  | 2          | Free lambda              | Free light chains  | Y                                   | N   | sCR                   | N/A                | N                 | Y                                           | 100%                         | 1+                   | Y       | Y**                                       | 30%                | 1+                   |
| 6  | 2          | Free lambda              | Free light chains  | N                                   | Y   | PR                    | 89.1%              | Y                 | Y                                           | 90%                          | 1+ & 3+ <sup>§</sup> | N       | N/A                                       | N/A                | N/A                  |
| 7  | 3          | IgG kappa                | Serum M-spike      | N                                   | N   | SD                    | N/A                | N                 | Y                                           | 100%                         | 2+                   | Y       | Y                                         | 80%                | 1+                   |
| 9  | 3          | Non-secretory            | BM plasma cells    | N                                   | N   | SD                    | N/A                | N                 | N                                           | 0%                           | N/A                  | N       | N/A##                                     | N/A                | N/A                  |
| 10 | 3          | IgG kappa                | Serum M-spike      | Y                                   | Y   | PR                    | 91%                | Y                 | Y                                           | 5%                           | 1+                   | Y       | N                                         | 0%                 | N/A                  |
| 15 | 3          | Free kappa               | EMP                | Y                                   | Y   | sCR                   | 100%               | Y                 | Y                                           | 80%                          | 2+                   | Y       | N                                         | 0%                 | N/A                  |
| 18 | 3          | IgG kappa                | Serum M-spike      | Y                                   | Y   | VGPR                  | 100%               | Y                 | Y                                           | 70%                          | 2+                   | N       | N/A                                       | N/A                | N/A                  |
| 19 | 3          | Free lambda              | Free light chains  | N                                   | Y   | SD                    | N/A                | N                 | Y                                           | < 5%                         | 1+                   | Y       | N/A                                       | N/A                | N/A                  |
| 11 | 4          | Free lambda              | Free light chains  | Y                                   | N   | sCR                   | N/A                | N                 | Y                                           | 50%                          | 1+                   | Y       | N                                         | 0%                 | N/A                  |
| 13 | 4          | Free kappa               | Urine M-spike      | Y                                   | N   | VGPR                  | N/A                | N                 | N                                           | 0%                           | N/A                  | Y       | N                                         | 0%                 | N/A                  |
| 14 | 4          | IgA kappa                | Serum M-spike      | Y                                   | N   | sCR                   | N/A                | N                 | Y                                           | 100%                         | 1+                   | N       | N/A                                       | N/A                | N/A                  |
| 16 | 4          | IgA lambda               | Serum M-spike      | Y                                   | N   | sCR                   | N/A                | Y                 | Y                                           | 80%                          | 3+                   | N       | N/A                                       | N/A                | N/A                  |
| 17 | 4          | IgG kappa                | Serum M-spike      | Y                                   | N   | VGPR                  | N/A                | Y                 | Y                                           | 90%                          | 2+                   | N       | N/A                                       | N/A                | N/A                  |

EMP, extramedullary plasmacytoma; BM, bone marrow; VGPR, very good partial response; PD progressive disease; SD, stable disease; (s)CR, (stringent) complete response; PR, partial response; MRD, minimal residual disease; Y/N, yes/no; N/A, not available. <sup>†</sup>High-risk cytogenetic abnormalities included the following: 1q amplification, del (17p), t (4;14), or t (14;16); \*\* Bone marrow biopsy obtained several months after progression of disease; ## Biopsy could not be obtained at progression; § Pre-and post-infusion samples included either bone marrow biopsies or

plasmacytomas. § There was bimodal GPRC5D staining intensity of 1+ and 3+ within the plasma cells. ‡ There was bimodal GPRC5D staining intensity of 1+ (in 60% of plasma cells) and 3+ (in 10% of plasma cells). The IDs for patients with an objective response are highlighted in red.

**Table S2: Pre-infusion characteristics including release criteria for MCARH109**

| Parameters    | % CAR          | % CD3          | Vector copy number per cell | Viability post-thaw              | Average number of beads               | Cytotoxic T-Lymphocytes lysis                 | CAR+CD4+CD8- CAR T helper cells (% of CD3+) | CAR+CD4-C D8+ cytotoxic CART cells (% of CD3+) | CAR+CD45R A+CCR7+ Naïve CART cells (% of CAR+) | CAR+CD45RA-CCR7+ central memory CART cells (% of CAR+) | CAR+CD45RA-CCR7- effector memory CART cells (% of CAR+) | CAR+CD45RA+CCR7- terminally differentiated effector CART cells (% of CAR+) |
|---------------|----------------|----------------|-----------------------------|----------------------------------|---------------------------------------|-----------------------------------------------|---------------------------------------------|------------------------------------------------|------------------------------------------------|--------------------------------------------------------|---------------------------------------------------------|----------------------------------------------------------------------------|
| Method        | Flow Cytometry | Flow Cytometry | Real-time PCR               | Acridine Orange/Propidium Iodide | Microscopy                            | Cytotoxic T-Lymphocytes lysis of target cells | Flow cytometry                              | Flow cytometry                                 | Flow cytometry                                 | Flow cytometry                                         | Flow cytometry                                          | Flow cytometry                                                             |
| Specification | ≥ 4%           | ≥ 80%          | ≤ 4 copies per cell         | ≥ 65%                            | ≤ 100 beads / 3x10 <sup>6</sup> cells | < 1 CAR: target ratio for 50% lysis           | NA                                          | NA                                             | NA                                             | NA                                                     | NA                                                      | NA                                                                         |
| 1             | 43.7           | 99.2           | 1.2                         | 79.1                             | 1.67                                  | 0.523                                         | 69.8                                        | 26.5                                           | 72.6                                           | 3.0                                                    | 2.4                                                     | 24.4                                                                       |
| 2             | 31.7           | 99.3           | 0.9                         | 81.0                             | 3.33                                  | 0.228                                         | 48.7                                        | 30.9                                           | 13.6                                           | 3.0                                                    | 2.0                                                     | 83.3                                                                       |
| 3             | 40.2           | 99.0           | 1.1                         | 83.1                             | 3.33                                  | 0.328                                         | 36.4                                        | 23.1                                           | 11.7                                           | 8.7                                                    | 2.0                                                     | 78.9                                                                       |
| 4             | 39.8           | 96.1           | 1.4                         | 81.9                             | 0.00                                  | 0.480                                         | 34.4                                        | 25.1                                           | 3.7                                            | 2.4                                                    | 1.4                                                     | 93.9                                                                       |
| 5             | 46.6           | 97.6           | 1.7                         | 70.8                             | 3.33                                  | 0.353                                         | 52.3                                        | 35.1                                           | 17.2                                           | 3.6                                                    | 2.4                                                     | 78.2                                                                       |
| 6             | 29.6           | 99.8           | 1.4                         | 79.7                             | 1.67                                  | 0.523                                         | 29.7                                        | 26.1                                           | 19.5                                           | 6.6                                                    | 5.4                                                     | 72.4                                                                       |
| 7             | 47.5           | 97.4           | 1.7                         | 84.4                             | 5.00                                  | 0.063                                         | 45.8                                        | 51.3                                           | 17.1                                           | 4.6                                                    | 3.7                                                     | 75.6                                                                       |
| 9             | 48.5           | 99.8           | 1.5                         | 83.2                             | 0.00                                  | 0.231                                         | 35.2                                        | 26.4                                           | 3.5                                            | 2.3                                                    | 3.2                                                     | 94.2                                                                       |
| 10            | 12.6           | 99.4           | 0.3                         | 83.8                             | 1.67                                  | 0.224                                         | 32.7                                        | 4.54                                           | 0.0                                            | 0.4                                                    | 1.1                                                     | 99.0                                                                       |
| 15            | 41.6           | 99.1           | 1.1                         | 80.7                             | 9.99                                  | 0.242                                         | 29.8                                        | 35.1                                           | 10.5                                           | 5.5                                                    | 5.5                                                     | 83.0                                                                       |
| 18            | 42.8           | 99.7           | 1.1                         | 83.6                             | 1.67                                  | 0.366                                         | 31.5                                        | 17.6                                           | 4.0                                            | 3.1                                                    | 3.2                                                     | 92.9                                                                       |
| 19            | 57.1           | 98.9           | 1.6                         | 81.3                             | 0.00                                  | 0.130                                         | 29.6                                        | 46.8                                           | 13.1                                           | 5.6                                                    | 5.4                                                     | 80.9                                                                       |
| 11            | 36.0           | 97.6           | 1.5                         | 81.3                             | 1.67                                  | 0.152                                         | 52.3                                        | 40                                             | 6.2                                            | 4.5                                                    | 4.5                                                     | 87.6                                                                       |
| 13            | 55.5           | 99.6           | 2.1                         | 84.1                             | 0.00                                  | 0.127                                         | 36.4                                        | 37.9                                           | 2.2                                            | 1.7                                                    | 1.4                                                     | 95.9                                                                       |
| 14            | 43.5           | 96.0           | 1.2                         | 82.0                             | 0.00                                  | 0.273                                         | 41.2                                        | 33                                             | 8.1                                            | 4.1                                                    | 4.3                                                     | 87.1                                                                       |
| 16            | 59.1           | 99.9           | 1.6                         | 74.6                             | 3.33                                  | 0.299                                         | 35.2                                        | 35.3                                           | 6.2                                            | 1.8                                                    | 1.3                                                     | 91.7                                                                       |
| 17            | 43.9           | 97.5           | 1.3                         | 83.7                             | 0.00                                  | 0.027                                         | 23.6                                        | 45.5                                           | 0.0                                            | 1.9                                                    | 1.2                                                     | 98.1                                                                       |

CAR, chimeric antigen receptor; PCR, polymerase chain reaction.



**Table S3: Prior multiple myeloma treatment history for patients treated with MCARH109**

| Patient ID | Line # | Treatment Regimen                    | Start date                  | Stop date  | Best response | Date of best response | Date of progressive disease |            |
|------------|--------|--------------------------------------|-----------------------------|------------|---------------|-----------------------|-----------------------------|------------|
| 1          | 1      | KRd → Mel 200 ASCT → R               | 11-06-2015                  | 08-2017    | VGPR          | 12-18-2015            | N/A                         |            |
|            | 2      | Elo-Rd                               | 08-16-2017                  | 01-17-2018 | SD            | -                     | 02-12-2018                  |            |
|            | 3      | Dara-d                               | 02-28-2018                  | 04-18-2018 | SD            | -                     | 04-17-2018                  |            |
|            | 4      | KCd                                  | 05-16-2018                  | 12-14-2018 | VGPR          | 07-09-2018            | 12-2018                     |            |
|            | 5      | KRd                                  | 01-23-2019                  | 11-20-2019 | SD            | -                     | 11-01-2019                  |            |
|            | 6      | DCEP                                 | 12-03-2019                  | 12-08-2019 | SD            | -                     | N/A                         |            |
|            | 7      | V-DT-PACE → Mel140 ASCT → KCd-T      | 01-03-2020                  | 07-2020    | VGPR          | 03-17-2020            | 07-23-2020                  |            |
|            | 8      | DCEP                                 | 08-03-2020                  | 08-07-2020 | PD            | -                     | 08-31-2020                  |            |
|            |        | Leukapheresis                        | 09-15-2020                  | 09-15-2020 |               |                       |                             |            |
|            |        | Bridging therapy:<br>Bendamustine-Vd | 09-16-2020                  | 09-16-2020 | PD            | -                     | 10-06-2020                  |            |
|            |        | MARCH109 infusion                    | 10-22-2020                  | 10-22-2020 |               |                       |                             |            |
| 2          | 1      | VCd → KRd                            | 06-19-2019                  | 07-05-2019 | SD            | -                     | N/A                         |            |
|            | 2      | VRd                                  | 08-29-2019                  | 12-13-2019 | PR            | 09-19-2019            | 12-23-2019                  |            |
|            | 3      | Mel200 ASCT                          | 01-15-2020                  | 01-17-2020 | PD            | -                     | 04-02-2020                  |            |
|            | 4      | Dara-Rd                              | 04-20-2020                  | 05-04-2020 | PD            | -                     | 05-08-2020                  |            |
|            | 5      | V-DCEP                               | 05-15-2020                  | 06-09-2020 | PR            | 07-07-2020            | 07-15-2020                  |            |
|            | 6      | T + KCd                              | 07-22-2020                  | 09-05-2020 | SD            | -                     | 08-21-2020                  |            |
|            |        |                                      | Leukapheresis               | 09-22-2020 | 09-22-2020    |                       |                             |            |
|            |        |                                      | Bridging therapy:<br>Elo-Pd | 09-25-2020 | 10-07-2020    | PD                    | -                           | 10-07-2020 |
|            |        | V-P-DCEP                             | 10-10-2020                  | 10-14-2020 | PD            | -                     | 10-28-2020                  |            |
|            |        | MARCH109 infusion                    | 11-24-2020                  | 11-24-2021 |               |                       |                             |            |
| 3          | 1      | KRd → Mel200 ASCT                    | 06-01-2016                  | 11-07-2016 | sCR           | 08-10-2016            | 08-16-2018                  |            |

|   |   |                                                       |            |            |      |            |            |
|---|---|-------------------------------------------------------|------------|------------|------|------------|------------|
|   | 2 | Dara-Rd                                               | 09-07-2018 | 09-12-2019 | SD   | -          | 09-20-2019 |
|   | 3 | KPd                                                   | 10-02-2019 | 10-17-2019 | PD   | -          | 10-16-2019 |
|   | 4 | Vd-PACE (without cisplatin) →<br>Mel200 ASCT → Elo-Pd | 11-01-2019 | 04-16-2020 | PR   | 02-04-2020 | 04-16-2020 |
|   | 5 | <b>Belantamab</b>                                     | 05-20-2020 | 08-13-2020 | PR   | 06-05-2020 | 08-30-2020 |
|   | 6 | V-DCEP                                                | 09-16-2020 | 09-20-2020 | SD   | -          | -          |
|   |   | Leukapheresis                                         | 10-19-2020 | 10-19-2020 |      |            |            |
|   |   | Bridging therapy:<br>V-DCEP                           | 10-22-2020 | 10-26-2020 | PD   | -          | 11-09-2020 |
|   |   | Mel40                                                 | 11-11-2020 | 11-11-2020 | PD   | -          | 12-08-2020 |
|   |   | MARCH109 infusion                                     | 12-23-2020 | 12-23-2020 |      |            |            |
| 4 | 1 | VCd                                                   | 03-06-2014 | 04-15-2014 | PR   | N/A        | N/A        |
|   | 2 | VRd → Mel200 ASCT → R                                 | 04-15-2014 | 08-2015    | sCR  | N/A        | 08-2015    |
|   | 3 | KRd                                                   | 08-20-2015 | 09-2015    | SD   | -          | N/A        |
|   | 4 | KCd                                                   | 11-11-2015 | 02-02-2016 | VGPR | N/A        | 01-23-2016 |
|   | 5 | Elo-Rd                                                | 02-2016    | 04-2016    | N/A  | N/A        | 04-2016    |
|   | 6 | Dara-Pd                                               | 05-2016    | 09-2016    | PR   | N/A        | N/A        |
|   | 7 | Allo-SCT → Pembro → DLI → Dara-Pd                     | 10-11-2016 | 08-01-2019 | sCR  | 12-13-2016 | 04-17-2019 |
|   | 8 | Ipilimumab + Dara-Pd                                  | 08-20-2019 | 10-06-2020 | SD   | -          | 10-06-2020 |
|   |   | Leukapheresis                                         | 11-24-2020 | 11-24-2020 |      |            |            |
|   |   | Bridging therapy:<br>Dara-Pd                          | 12-02-2020 | 01-02-2021 | SD   | -          | N/A        |
|   |   | MARCH109 infusion                                     | 01-22-2021 | 01-22-2021 |      |            |            |
| 5 | 1 | VRd → Mel200 ASCT → KRd                               | 01-26-2017 | 01-2019    | CR   | N/A        | 01-2019    |
|   | 2 | Dara-Pd                                               | 02-22-2019 | 04-16-2019 | SD   | -          | 04-2019    |
|   | 3 | PCd                                                   | 04-23-2019 | 05-29-2019 | SD   | -          | 06-06-2019 |
|   | 4 | <b>BCMA-directed CAR T cell therapy</b>               | 07-10-2019 | 07-15-2019 | sCR  | 09-16-2020 | 11-2019    |
|   | 5 | Dara-Pd                                               | 10-07-2020 | 12-20-2020 | SD   | -          | 12-29-2020 |
|   |   | Leukapheresis                                         | 01-11-2021 | 01-11-2021 |      |            |            |
|   |   | Bridging therapy:<br>Dara-Pd                          | 01-15-2021 | 01-30-2021 | PD   | -          | 02-09-2021 |

|   |    |                                                            |            |                          |      |            |            |
|---|----|------------------------------------------------------------|------------|--------------------------|------|------------|------------|
|   |    | MARCH109 infusion                                          | 02-19-2021 | 02-19-2021               |      |            |            |
| 6 | 1  | Vd + liposomal doxorubicin →<br>Mel200 ASCT → R → Allo-SCT | 07-2009    | 06-03-2010<br>03-27-2018 | CR   | 09-16-2009 | 03-23-2018 |
|   | 2  | VCd                                                        | 03-27-2018 | 12-02-2019               | SD   | -          | N/A        |
|   | 3  | KRd                                                        | 04-05-2018 | 10-19-2020               | sCR  | 05-21-2018 | 12-16-2019 |
|   | 4  | Dara-Pd                                                    | 03-09-2020 | 01-20-2021               | PR   | 05-30-2020 | 12-14-2020 |
|   |    | Leukapheresis                                              | 01-20-2021 |                          |      |            |            |
|   |    | Bridging therapy:<br>Dara-Pd                               | 01-25-2021 | 02-13-2021<br>03-05-2021 | PD   | -          | 02-28-2021 |
|   |    | MARCH109 infusion                                          | 03-05-2021 |                          |      |            |            |
| 7 | 1  | VCd                                                        | 01-2013    | 02-2013                  | N/A  | N/A        | N/A        |
|   | 2  | VCd + R                                                    | 02-2013    | 04-2013                  | N/A  | N/A        | N/A        |
|   | 3  | V-DCEP                                                     | 04-30-2013 | 06-2013                  | N/A  | N/A        | N/A        |
|   | 4  | Bendamustine-Rituximab                                     | 07-16-2013 | 07-19-2013               | N/A  | N/A        | N/A        |
|   | 5  | Carfilzomib                                                | 08-06-2013 | 08-13-2013               | N/A  | N/A        | N/A        |
|   | 6  | C mobilization → Mel-ASCT → Pd                             | 08-30-2013 | 2014                     | N/A  | N/A        | 2014       |
|   | 7  | Daratumumab                                                | 04-14-2014 | 10-06-2015               | N/A  | N/A        | 10-06-2015 |
|   | 8  | KRd                                                        | 11-12-2015 | 2016                     | N/A  | N/A        | 2016       |
|   | 9  | Selinexor                                                  | N/A        | N/A                      | N/A  | N/A        | 2016       |
|   | 10 | Liposomal doxorubicin + VP                                 | N/A        | N/A                      | N/A  | N/A        | N/A        |
|   | 11 | Dexamethasone                                              | 2017       | 12-11-2017               | SD   | -          | N/A        |
|   | 12 | Venetoclax-Vd                                              | 12-26-2017 | 01-28-2018               | SD   | -          | N/A        |
|   | 13 | <b>BCMA-directed CAR T cell therapy</b>                    | 04-01-2018 | 04-03-2018               | VGPR | 07-31-2018 | 12-17-2019 |
|   | 14 | Venetoclax-Vd                                              | 02-08-2020 | 11-28-2020               | SD   | -          | N/A        |
|   |    | Leukapheresis                                              | 01-25-2021 | 01-25-2021               |      |            |            |
|   |    | Bridging therapy:<br>Venetoclax-Vd                         | 01-30-2021 | 02-13-2021               | PD   | -          | 03-23-2021 |
|   |    | MARCH109 infusion                                          | 04-05-2021 | 04-05-2021               |      |            |            |
| 9 | 1  | VRd                                                        | 09-25-2018 | 12-11-2018               | SD   | -          | -          |
|   | 2  | KCd                                                        | 12-27-2018 | 01-10-2019               | SD   | -          | -          |
|   | 3  | VTd → PACE → Mel200 ASCT                                   | 02-05-2019 | 04-08-2019               | PR   | 04-01-2019 | 06-19-2019 |
|   | 4  | Dara-Pd                                                    | 07-17-2019 | 12-28-2020               | PR   | 09-04-2019 | 01-11-2021 |

|    |                                                 |                                                                                                                                                                           |                                                                                                                                          |                                                                                                                                         |                                                           |                                                                                                               |                                                                                                                                          |
|----|-------------------------------------------------|---------------------------------------------------------------------------------------------------------------------------------------------------------------------------|------------------------------------------------------------------------------------------------------------------------------------------|-----------------------------------------------------------------------------------------------------------------------------------------|-----------------------------------------------------------|---------------------------------------------------------------------------------------------------------------|------------------------------------------------------------------------------------------------------------------------------------------|
|    |                                                 | Leukapheresis<br>Bridging therapy:<br>Bendamustine-d<br>MARCH109 infusion                                                                                                 | 02-10-2021<br>02-12-2021<br>04-19-2021                                                                                                   | 02-10-2021<br>02-13-2021<br>04-19-2021                                                                                                  | SD                                                        | -                                                                                                             | N/A                                                                                                                                      |
| 10 | 1<br>2<br>3<br>4<br>5<br>6<br>7<br>8<br>9       | KRd<br>Dara-Pd<br>KRd → Mel140 ASCT → R-Ixa-d<br>Elo-Pd<br>KRd<br><b>Belantamab</b><br><b>BCMA-directed CAR T cell therapy</b><br>V-DCEP<br>FcRH5-CD3 bispecific antibody | 05-13-2016<br>10-13-2017<br>01-19-2018<br>12-03-2019<br>03-27-2020<br>04-22-2020<br>05-20-2020<br>06-19-2020<br>08-26-2020               | 09-22-2016<br>01-09-2018<br>11-2019<br>02-18-2020<br>04-08-2020<br>04-22-2020<br>05-25-2020<br>07-25-2020<br>01-20-2021                 | sCR<br>SD<br>PR<br>SD<br>PD<br>PD<br>PD<br>PR<br>PR       | 08-24-2016<br>-<br>07-20-2018<br>-<br>-<br>-<br>-<br>08-14-2020<br>11-25-2020                                 | 09-19-2017<br>-<br>11-13-2019<br>03-03-2020<br>04-08-2020<br>05-06-2020<br>06-10-2020<br>N/A<br>02-03-2021                               |
|    |                                                 | Leukapheresis<br>Bridging therapy:<br>Bendamustine-Vd<br>MARCH109 infusion                                                                                                | 02-15-2021<br>02-17-2021<br>05-03-2021                                                                                                   | 02-15-2021<br>04-07-2021<br>05-03-2021                                                                                                  | SD                                                        | -                                                                                                             | 03-31-2021                                                                                                                               |
| 11 | 1<br>2<br>3<br>4<br>5<br>6<br>7<br>8<br>9<br>10 | VRd<br>KRd → R<br>MEL200 ASCT → V<br>Dara-Vd<br>Dara-Rd<br>KCd<br>DCEP<br>KCd + T<br><b>BCMA-directed CAR T cell therapy</b><br>Elo-Pd                                    | 07-14-2015<br>11-18-2015<br>09-06-2016<br>05-16-2018<br>08-07-2018<br>10-09-2018<br>01-17-2019<br>02-19-2019<br>04-11-2019<br>01-06-2021 | 09-25-2015<br>08-09-2016<br>05-01-2018<br>07-24-2018<br>10-02-2018<br>12-12-2018<br>01-20-2019<br>02-21-2019<br>4-16-2019<br>01-28-2021 | PR<br>PR<br>CR<br>SD<br>SD<br>PR<br>PR<br>PR<br>sCR<br>PD | 08-04-2015<br>12-01-2015<br>11-07-2016<br>-<br>-<br>10-24-2018<br>01-25-2019<br>02-25-2019<br>05-14-2019<br>- | 09-15-2015<br>07-12-2016<br>05-01-2018<br>07-24-2018<br>09-24-2018<br>12-11-2018<br>02-08-2019<br>02-27-2019<br>12-22-2020<br>02-09-2021 |
|    |                                                 | Leukapheresis<br>Bridging therapy:<br>Bendamustine-Vd<br>Isa-Pd                                                                                                           | 02-17-2021<br>02-22-2021<br>04-08-2021                                                                                                   | 02-17-2021<br>03-25-2021<br>04-28-2021                                                                                                  | PD<br>PR                                                  | -<br>04-28-2021                                                                                               | 03-25-2021<br>05-18-2021                                                                                                                 |

|    |    |                                         |            |            |      |            |            |
|----|----|-----------------------------------------|------------|------------|------|------------|------------|
|    |    | MARCH109 infusion                       | 06-02-2021 | 06-02-2021 |      |            |            |
| 13 | 1  | KRd + clarithromycin → R                | 2-11-2015  | 04-26-2016 | N/A  | N/A        | 04-2016    |
|    | 2  | Elo-Rd                                  | 05-09-2016 | 08-23-2016 | N/A  | N/A        | 08-2016    |
|    | 3  | K-Mel-d                                 | 09-26-2016 | 05-30-2017 | N/A  | N/A        | 05-2017    |
|    | 4  | Nivolumab-Pd                            | 06-20-2017 | 07-03-2017 | N/A  | N/A        | N/A*       |
|    | 5  | Dara-V-Pd → Mel200 ASCT → V-Pd          | 04-08-2017 | 09-18-2018 | N/A  | N/A        | 09-2018    |
|    | 6  | Ven-Vd                                  | 11-06-2018 | 01-07-2019 | N/A  | N/A        | N/A        |
|    | 7  | Ven-Kd                                  | 01-2019    | 10-15-2019 | N/A  | N/A        | 10-29-2019 |
|    | 8  | Anti-BCMA monoclonal antibody           | 11-26-2019 | 12-17-2019 | N/A  | N/A        | 12-2019    |
|    | 9  | Selinexor-Kd                            | 12-24-2019 | 01-07-2020 | N/A  | N/A        | N/A*       |
|    | 10 | Bendamustine-Vd                         | 01-07-2020 | 03-10-2020 | SD   | -          | 03-03-2020 |
|    | 11 | <b>BCMA-directed CAR T cell therapy</b> | 04-01-2020 | 04-06-2020 | sCR  | 05-04-2020 | 12-29-2020 |
|    | 12 | Cyclophosphamide                        | 01-12-2021 | 01-18-2021 | SD   | -          | N/A        |
|    | 13 | <b>BCMA-directed CAR T cell therapy</b> | 02-03-2021 | 02-08-2021 | PR   | 03-09-2021 | 04-13-2021 |
|    |    | Leukapheresis                           | 04-26-2021 | 04-26-2021 |      |            |            |
|    |    | Bridging therapy:<br>Isa-Kd             | 05-08-2021 | 05-08-2021 | PD   | -          | 06-08-2021 |
|    |    | MARCH109 infusion                       | 06-30-2021 | 06-30-2021 |      |            |            |
| 14 | 1  | VRd                                     | 02-2015    | 08-2015    | N/A  | N/A        | N/A        |
|    | 2  | KRd → Mel200 ASCT → R                   | 09-03-2015 | 10-03-2017 | VGPR | 09-14-2016 | 09-12-2017 |
|    | 3  | Elo-Rd                                  | 10-17-2017 | 01-09-2018 | SD   | -          | 01-09-2018 |
|    | 4  | Dara-Pd                                 | 01-23-2018 | 07-14-2018 | SD   | -          | 07-17-2018 |
|    | 5  | <b>BCMA-directed CAR T cell therapy</b> | 08-30-2018 | 09-04-2018 | sCR  | 12-11-2018 | 05-06-2021 |
|    |    | Leukapheresis                           | 05-24-2021 | 05-24-2021 |      |            |            |
|    |    | Bridging therapy:<br>None               | -          | -          |      |            |            |
|    |    | MARCH109 infusion                       | 07-14-2021 | 07-14-2021 |      |            |            |
| 15 | 1  | Dara-Krd → Mel200 ASCT → R              | 06-13-2018 | 12-2019    | sCR  | 09-19-2018 | 12-13-2019 |
|    | 2  | Elo-Pd                                  | 12-27-2019 | 01-11-2020 | PD   | -          | 01-11-2019 |
|    | 3  | V-DCEP → Dara-Kd                        | 01-16-2020 | 11-13-2020 | sCR  | 02-24-2020 | 11-20-2020 |
|    | 4  | Dara-Pd                                 | 12-09-2020 | 12-23-2020 | PD   | -          | 12-23-2020 |
|    | 5  | V-DCEP                                  | 12-31-2020 | 01-03-2021 | VGPR | 02-02-2021 | N/A        |

|    |   |                                                               |            |            |      |            |            |
|----|---|---------------------------------------------------------------|------------|------------|------|------------|------------|
|    | 6 | <b>BCMA-CD3 bispecific antibody</b>                           | 02-10-2021 | 05-14-2021 | sCR  | 03-18-2021 | 05-12-2021 |
|    |   | Leukapheresis                                                 | 06-09-2021 | 06-09-2021 |      |            |            |
|    |   | Bridging therapy:<br>VCd                                      | 07-02-2021 | 07-02-2021 | SD   | -          | 08-27-2021 |
|    |   | MARCH109 infusion                                             | 09-13-2021 | 09-13-2021 |      |            |            |
| 16 | 1 | VCd → Mel200 ASCT → VRd → R                                   | 08-18-2014 | 09-2016    | sCR  | 02-25-2015 | 08-23-2016 |
|    | 2 | KPd → Pd                                                      | 09-22-2016 | 04-2018    | VGPR | 01-04-2017 | N/A        |
|    | 3 | KPd                                                           | 04-04-2018 | 10-26-2019 | SD   | -          | 10-25-2019 |
|    | 4 | Elo-Pd                                                        | 11-08-2019 | 02-01-2020 | SD   | -          | 01-31-2020 |
|    | 5 | Dara-Vd                                                       | 02-08-2020 | 05-21-2021 | VGPR | 01-15-2021 | 06-01-2021 |
|    |   | Leukapheresis                                                 | 06-14-2021 | 06-14-2021 |      |            |            |
|    |   | Bridging therapy:<br>Dara-Vd                                  | 06-26-2021 | 07-23-2021 | SD   | -          | -          |
|    |   | MARCH109 infusion                                             | 08-23-2021 | 08-23-2021 |      |            |            |
| 17 | 1 | KRd                                                           | 02-2018    | 08-2018    | VGPR | 06-2018    | 09-2018    |
|    | 2 | V-DT-PACE → Mel200 ASCT                                       | 10-2018    | 01-18-2019 | PR   | 03-14-2019 | 04-2019    |
|    | 3 | Rd                                                            | 05-2019    | 09-2019    | SD   | -          | 09-2019    |
|    | 4 | Elo-Rd                                                        | 10-08-2019 | 11-2019    | PD   | -          | 11-2019    |
|    | 5 | Dara-d                                                        | 11-14-2019 | 05-20-2020 | SD   | -          | 06-02-2020 |
|    | 6 | Bendamustine-Vd → <b>BCMA-directed<br/>CAR T cell therapy</b> | 06-29-2020 | 07-27-2020 | VGPR | 12-01-2020 | 05-25-2021 |
|    |   | Leukapheresis                                                 | 06-16-2021 | 06-16-2021 |      |            |            |
|    |   | Bridging therapy:<br>Isa-Kd                                   | 06-17-2021 | 08-04-2021 | PD   | -          | N/A        |
|    |   | MARCH109 infusion                                             | 08-31-2021 | 08-31-2021 |      |            |            |
| 18 | 1 | VRd → Mel200 ASCT → Allo-SCT →<br>DLI x 3                     | 10-27-2012 | 05-21-2014 | sCR  | 09-11-2013 | 04-24-2018 |
|    | 2 | Lenalidomide                                                  | 05-24-2018 | 09-04-2018 | SD   | -          | N/A*       |
|    | 3 | Pomalidomide                                                  | 10-16-2018 | 01-2019    | SD   | -          | 01-30-2019 |
|    | 4 | Dara-Vd                                                       | 02-12-2019 | 10-28-2019 | SD   | -          | 10-28-2019 |
|    | 5 | KPd + DLI x 1                                                 | 12-11-2019 | 10-07-2020 | sCR  | 07-15-2020 | 04-28-2021 |

|    |   |                                                                |                                        |                                        |     |            |            |            |
|----|---|----------------------------------------------------------------|----------------------------------------|----------------------------------------|-----|------------|------------|------------|
|    |   | Leukapheresis<br>Bridging therapy:<br>Kpd<br>MARCH109 infusion | 07-07-2021<br>07-14-2021<br>11-10-2021 | 07-07-2021<br>09-21-2021<br>11-10-2021 |     | SD         | -          | -          |
| 19 | 1 | VRD → Mel200 ASCT → R                                          | 07-15-2010                             | 07-2013                                | sCR | 08-2010    | 07-03-2013 |            |
|    | 2 | Vd → V                                                         | 07-22-2013                             | 01-2015                                | sCR | 09-09-2013 | 01-2015    |            |
|    | 3 | KRd → K                                                        | 01-2015                                | 07-2017                                | sCR | 06-2015    | 07-2017    |            |
|    | 4 | DPd                                                            | 07-13-2017                             | 05-2018                                | sCR | 09-18-2017 | 05-2018    |            |
|    | 5 | VCd                                                            | 05-2018                                | 01-2019                                | N/A | N/A        | 01-2019    |            |
|    | 6 | Pd                                                             | 01-2019                                | 07-23-2019                             | N/A | N/A        | 07-30-2019 |            |
|    | 7 | <b>BCMA-directed CAR T cell therapy</b>                        | 09-24-2019                             | 09-24-2019                             | sCR | 10-21-2019 | 06-21-2021 |            |
|    |   | Leukapheresis<br>Bridging therapy:<br>PCd<br>MARCH109 infusion | 07-14-2021<br>07-2021<br>09-27-2021    | 07-14-2021<br>08-12-2021<br>09-27-2021 |     | SD         | -          | 09-22-2021 |

V, bortezomib; C, cyclophosphamide; d, dexamethasone; Mel, melphalan; ASCT, autologous stem cell transplant; R, lenalidomide; K, carfilzomib; P, pomalidomide; Elo, elotuzumab; dara, daratumumab; T, thalidomide; PACE, cisplatin + adriamycin + cyclophosphamide + etoposide combination chemotherapy; BCMA, B cell maturation antigen; CAR, chimeric antigen receptor; Ven, venetoclax; DCEP, dexamethasone + cyclophosphamide + etoposide + cisplatin combination chemotherapy; P, prednisone; Ixa, ixazominb; Allo-SCT, allogeneic stem cell transplant; Pembro, pembrolizumab; DLI, donor lymphocyte infusion; (s)CR, (stringent) complete response; VGPR, very good partial response; partial response, PR; SD, stable disease; progressive disease, PD; N/A not available; \* stopped due to toxicity

**Table S4: Baseline characteristics of patients with and without delayed cerebellar toxicity**

|                                                        | <b>No delayed toxicity (n=15)</b> | <b>Delayed toxicity (n=2)</b> |
|--------------------------------------------------------|-----------------------------------|-------------------------------|
| <b>Median age, years (range)</b>                       | 60 (38-76)                        | 66 (63-68)                    |
| <b>Male, n (%)</b>                                     | 12 (80)                           | 1 (50)                        |
| <b>High-risk cytogenetics, n (%)*</b>                  | 11 (73)                           | 2 (100)                       |
| <b>Extramedullary plasmacytoma, n (%)</b>              | 7 (47)                            | 0 (0)                         |
| <b>BM plasma cells &gt; 30%, n (%)</b>                 | 5 (33)                            | 1 (50)                        |
| <b>M-spike &gt;3 gm/dL or FLC &gt;100 mg/dL, n (%)</b> | 2 (13)                            | 1 (50)                        |
| <b>Prior Lines of Therapy, median (range)</b>          | 6 (5-14)                          | 8 (5-10)                      |
| <b>Refractory to last line, n (%)</b>                  | 14 (93)                           | 2 (100)                       |
| <b>Penta-exposed, n (%)</b>                            | 15 (100)                          | 15 (100)                      |
| <b>Triple-refractory, n (%)</b>                        | 14 (93)                           | 2 (100)                       |
| <b>Prior Autologous Transplant, n (%)</b>              | 15 (100)                          | 2 (100)                       |
| <b>Prior Allogeneic Transplant, n (%)</b>              | 3 (20)                            | 0 (0)                         |



|                                        |         |         |
|----------------------------------------|---------|---------|
| <b>Prior BCMA therapy, n (%)**</b>     | 9 (60)  | 1 (50)  |
| <b>Prior CAR T cell therapy, n (%)</b> | 7 (47)  | 1 (50)  |
| <b>Bridging therapy, n (%)</b>         | 14 (93) | 2 (100) |
| <b>Refractory to bridging, n (%)</b>   | 13 (87) | 2 (100) |

CAR, chimeric antigen receptor; BCMA, B cell maturation antigen.
